# Supplementary material
Source: PubMed Central journal article supplement (PMC6464640)
Supplement: NIHMS1016119-supplement-Supplement.pdf [file NIHMS1016119-supplement-Supplement.pdf]

A

T<sup>S</sup>\*LLMVIMGELEPSEGK  $\Delta$ mass = 79.96633 Da  
vs.  
TSLLM(ox)[V=>M(ox)]IM(ox)GELEPSEGK  $\Delta$ mass = 79.97536 Da

B

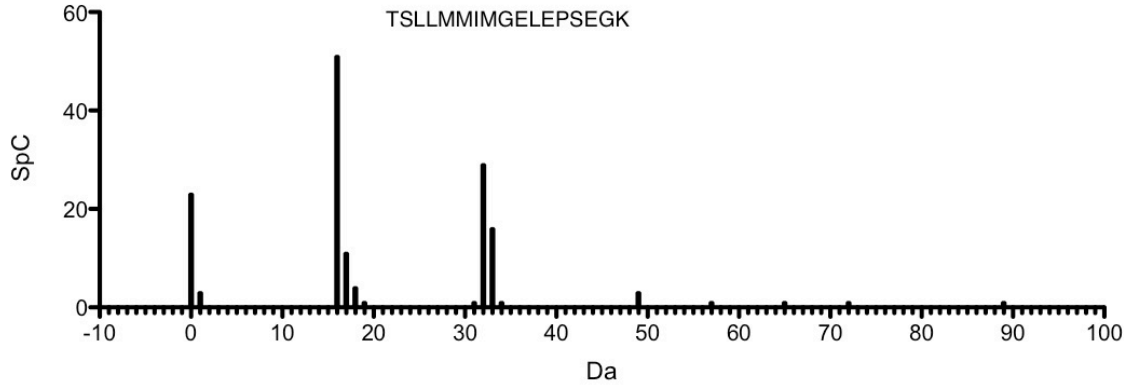

C

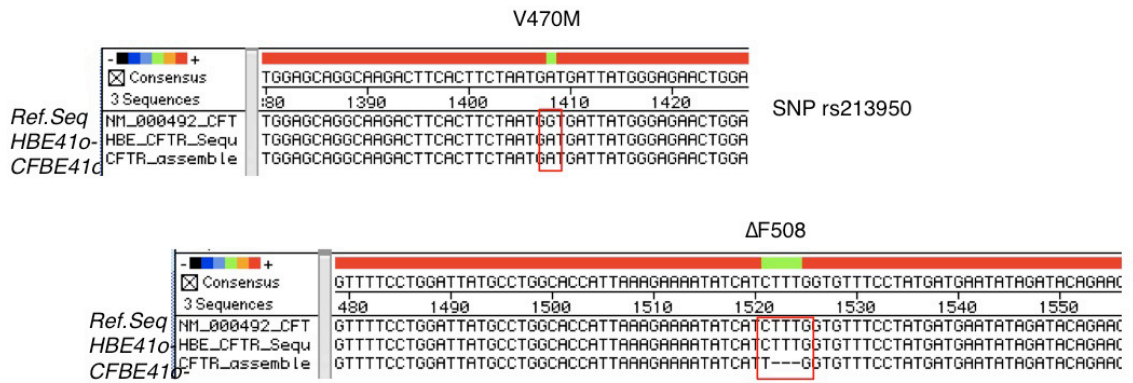

**Figure S1. Identification of CFTR SNPs in CFBE410<sup>-</sup> and HBE410<sup>-</sup> cell lines. (A and B)** Blind-PTM identifies SNP rs213950 in CFBE410<sup>-</sup> cells, whereas forward search against current Uniprot releases (04-2012 to 06-2016) would indicate a mass similar to phosphorylation of the adjacent residue, Ser<sup>466</sup>. (C) RT-PCR and sequencing of the PCR product confirms presence of SNP rs213950 in CFBE410<sup>-</sup> and HBE410<sup>-</sup> cells.

*[Figure and legend continues, next page].*

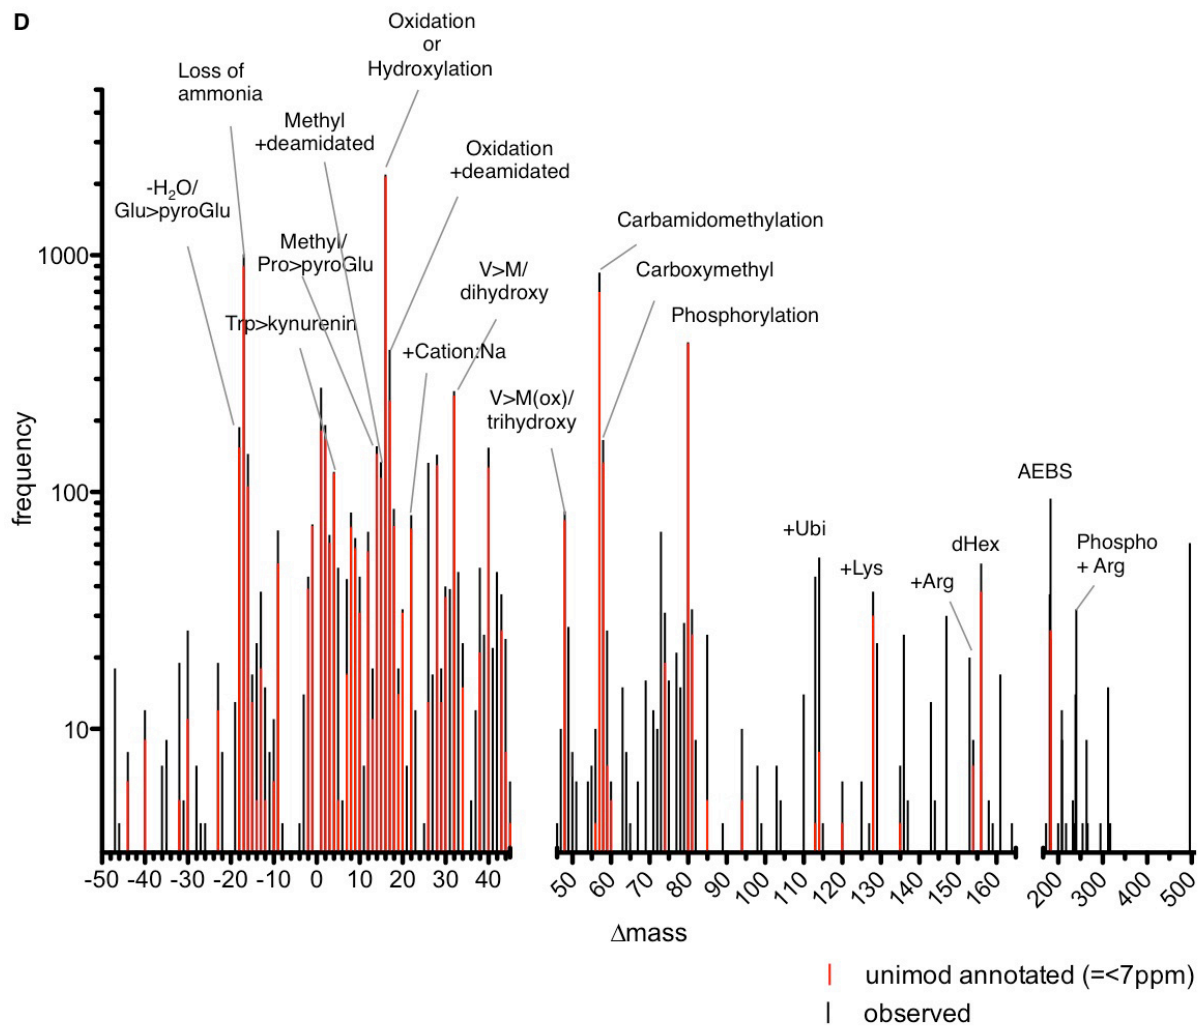

**Figure S1, continued: (D)** Modified CFTR spectra identified with Blind-PTM and binned by mass shift. Possible interpretation of several mass shifts is indicated. Data represent independent biological replicates ( $\Delta$ F508,  $n=17$ ; wt,  $n=14$ ).

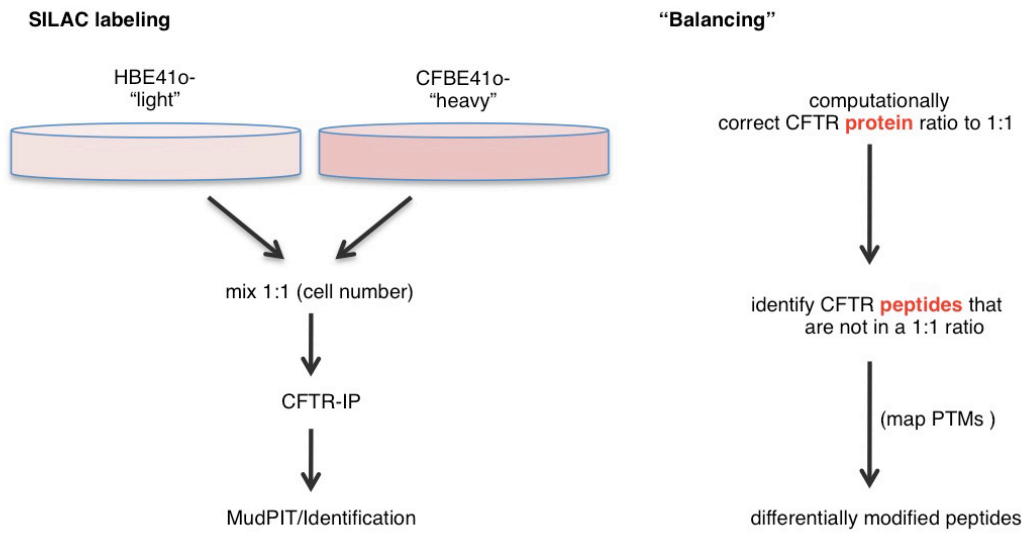

**Figure S2. Balanced SILAC approach.** Outline of experimental and computational approach.

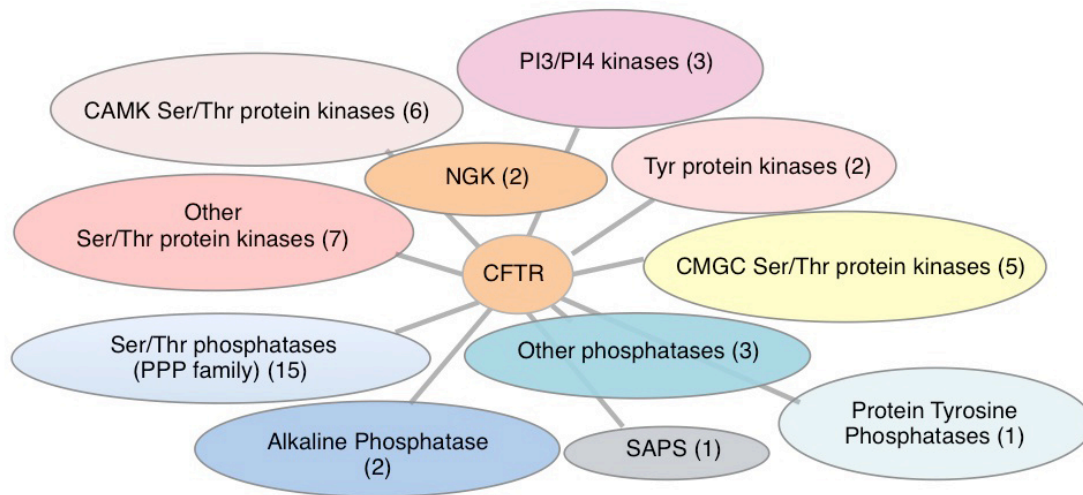

**Figure S3. Kinase families in the CFTR interactome.** The graph shows the kinase families and number of identified individual members (in parentheses) in the CFTR interactome (30).

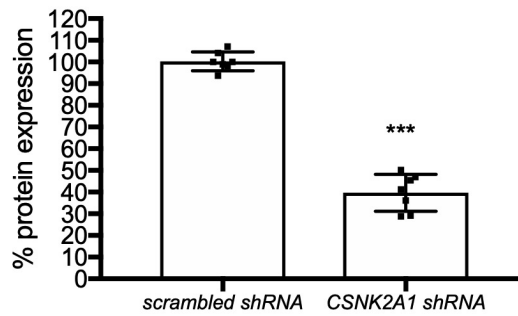

**Figure S4. CK2 $\alpha$  knockdown.** Relative CK2 $\alpha$  protein abundance in CFBE41o-cells upon control or shRNA-mediated knockdown with a *CSNK2A1*-specific shRNA. Data are mean  $\pm$  S.D. of three independent biological replicates per treatment. Unpaired t-test: \*\*\*\* $P < 0.0001$ .

| Phosphopeptide sequence | Site   | A-score<br>(-10xlog(P)) | Mutation in CF<br>patients    | Clinical<br>significance                      | Xcorr  | DeltaCN |
|-------------------------|--------|-------------------------|-------------------------------|-----------------------------------------------|--------|---------|
| LELSDIYQIPSVDS*ADNLSEK  | S45    | 42.44                   |                               |                                               | 4.0429 | 0.3716  |
| LVITS*EMENIQSVK         | S263   | 0                       |                               |                                               | 4.1106 | 0.3345  |
| T*SNGDSDLFFSNFSLLGTPVLK | T421   | 19.21                   | T421A                         | CBAVD                                         | 4.1574 | 0.401   |
| TS*NGDSDLFFSNFSLLGTPVLK | S422   | 14.12                   |                               |                                               | 3.4131 | 0.3547  |
| TSNGDDS*LFFSNFSLLGTPVLK | S427   | 30.66                   |                               |                                               | 5.1744 | 0.4506  |
| TSNGDSDLFFSNFSLLGTPVLK  | T438   | 40.34                   | T438A                         | CBAVD (5T<br>mutation on the<br>other allele) | 4.9924 | 0.4065  |
| IS*FCSQFSWIMPGTIK       | S489   | 24.76                   | S489X                         | CF                                            | 2.9974 | 0.3319  |
| DNIVLGEGGITLS*GGQR      | S549   | 64.79                   | S549N, S549I,<br>S549F, S549R | CF, severe clinical<br>phenotype              | 4.4221 | 0.3623  |
| LMGCDS*FDQFSAER         | S649   | 84.83                   |                               |                                               | 3.1118 | 0.2678  |
| NS*ILTETLHR             | S660   | 56.02                   | S660T                         | asymptomatic                                  | 4.3942 | 0.3164  |
| FS*LEGDAPVSWTETK        | S670   | 109.73                  |                               |                                               | 4.023  | 0.3694  |
| FSLEGDAPVS*WTETK        | S678 ? | 11.36                   |                               |                                               | 3.7289 | 0.3749  |
| NS*ILNPINSIR            | S700   | 117.01                  |                               |                                               | 2.9966 | 0.3042  |
| T*PLQMNGIEEDSDEPLER     | T717   | 70.1                    |                               |                                               | 3.6552 | 0.4598  |
| TPLQMNGIEEDS*DEPLER     | S728   | 121.23                  |                               |                                               | 5.7429 | 0.4231  |
| LS*LVPDSEQGEAILPR       | S737   | 94.12                   | S737F                         | elevated sweat<br>chloride                    | 3.1023 | 0.3604  |
| VS*LAPQANLTELDIYSR      | S795   | 89.21                   |                               |                                               | 5.6752 | 0.4943  |
| LS*QETGLEISSEINEEDLK    | S813   | 69.89                   | S813P                         | very mild CF                                  | 4.9931 | 0.3953  |
| LSQET*GLEISSEINEEDLK    | T816   | 20.9                    |                               |                                               | 6.9409 | 0.3009  |
| LSQETGLEIS*EEINEEDLK    | S821   | 93.13                   |                               |                                               | 5.2613 | 0.3691  |
| ECFFDDMES*IPAVTTWNTYLR  | S839   | 69.99                   |                               |                                               | 4.1339 | 0.1801  |

**Table S1. Identified phosphopeptides.** Given are sequences with PTM site position, A-score value for phosphorylation site, Xcorr and  $\Delta Cn$  values as well as mutations occurring in CF patients and their clinical significance (if any). Table summarizes n= 90 independent biological experiments.

**A**

| ubiquitinated peptide sequence        | position | Mutation in CF patients | clinical significance                                                            |
|---------------------------------------|----------|-------------------------|----------------------------------------------------------------------------------|
| SPLEK(114.0429)ASVVS                  | K8       |                         |                                                                                  |
| LELSDIYQIPSVDSADNLSEK(114.0429)LER    | K52      |                         |                                                                                  |
| AVYK(114.0429)DADLYLLDSPFGYLDVLTEK    | K564     | K564E                   | CBAVD                                                                            |
| DADLYLLDSPFGYLDVLTEK(114.0429)EIFESC  | K584     |                         |                                                                                  |
| FIDMPTEGK(114.0429)PTK                | K1174    |                         |                                                                                  |
| SVIK(114.0429)ACQLEEDISK              | K522     |                         |                                                                                  |
| K(114.0429)TSNGDDSLFFSNFSLLGTPVLK     | K420     |                         |                                                                                  |
| TSNGDDSLFFSNFSLLGTPVLK(114.0429)DINFK | K442     |                         |                                                                                  |
| TGSGK(114.0429)STLLSAFLR              | K1250    |                         | K1250A mutation dramatically prolonged burst duration (abolishes ATP hydrolysis) |

**B**

| methylated peptide sequence       | position | Mutation in CF patients | clinical significance                                                                                                                                                                        |
|-----------------------------------|----------|-------------------------|----------------------------------------------------------------------------------------------------------------------------------------------------------------------------------------------|
| TSNGDDSLFFSNFSLLGTPVLK(14.0157)DI | K442     |                         |                                                                                                                                                                                              |
| GQLLAVAGSTGAGK(14.0157)T          | K464     | K464N                   | Severe phenotype at early age with pancreatic insufficiency, chronic cough and bronchial infection. 3659delC mutation on the other chromosome (expected to lead to pancreatic insufficiency) |
| RNSILTETHR(14.0157)R              | R668     | R668C                   | does not cause CF                                                                                                                                                                            |
| K(14.0157)NSILNPINSIR             | K698     |                         |                                                                                                                                                                                              |
| LSLVPDSEQEAILPR(14.0157)I         | R751     | R751P, R751C, R751L     | lung disease, carrier testing for R751C                                                                                                                                                      |
| ISVISTGPTLQAR(14.0157)R           | R764     |                         |                                                                                                                                                                                              |
| VSLAPQANLTELDIYSR(14.0157)R       | R810     | R810G                   | CBAVD ( $\Delta$ F508 on other allele)                                                                                                                                                       |

**Table S2. CFTR ubiquitination and methylation sites identified in the forward search.** Given are identified peptide sequences, PTM site, mutations occurring in CF patients and their clinical significance. Table summarizes n= 90 independent biological experiments.
